# Supplementary material
Source: PubMed Central journal article supplement (PMC1755850)
Supplement: archdisch_archdischild;87_6_506__1.pdf [file archdisch_archdischild%3B87_6_506__1.pdf]

**Table 3. Risk Factors for Psychosocial Outcome**

|                                                                 | Definition                                                                                                                                                                                            | Results<br>Group <sup>#</sup> A | B            |
|-----------------------------------------------------------------|-------------------------------------------------------------------------------------------------------------------------------------------------------------------------------------------------------|---------------------------------|--------------|
| <i>Pre-, peri- and postoperative risk factors</i>               |                                                                                                                                                                                                       |                                 |              |
| Perinatal asphyxia                                              | APGAR-score <7 after 5 minutes                                                                                                                                                                        | 13.3% (8/60)                    | 13.0% (7/54) |
| Severe preoperative hypoxia                                     | pH value <7.2 in the umbilical venous blood (n=3); severe postasphyxia syndrome with organ failure and cerebral seizures (n=2); repeated severe cyanosis caused by intracardiac mixing problems (n=2) | 11.7% (7/60)                    | 5.6% (3/54)  |
| Age at surgery (days)                                           | -                                                                                                                                                                                                     | 7.1 , 5.1 *                     | 7.2 , 5.3 *  |
| Duration of DHCA (min)                                          | -                                                                                                                                                                                                     | 60.0 , 3.1 *                    | 59.8 , 3.0 * |
| Duration of CPB (min)                                           | -                                                                                                                                                                                                     | 63.4 , 13.7*                    | 62.9 , 14.0* |
| Duration of aortic cross clamping (min)                         | -                                                                                                                                                                                                     | 65.7 , 8.1 *                    | 65.8 , 8.5 * |
| Duration of core cooling on CPB (min)                           | -                                                                                                                                                                                                     | 10.8 , 2.7 *                    | 10.9 , 2.7 * |
| Temperature at initiation of DHCA (°C)                          | -                                                                                                                                                                                                     | 15.1 , 1.0 *                    | 15.1 , 1.0 * |
| Additional VSD patch closure                                    | -                                                                                                                                                                                                     | 3.3% (2/60)                     | 3.7% (2/54)  |
| Perioperative and postoperative cardiocirculatory insufficiency | Low cardiac output <sup>†</sup> in spite of adequate filling pressures and inotropic and vasodilatory therapy                                                                                         | 16.7% (10/60)                   | 14.8% (8/54) |
| Perioperative and postoperative resuscitation events            | Necessity of pharmacological and/or mechanical resuscitation                                                                                                                                          | 6.7% (4/60)                     | 7.4% (4/54)  |
| Postoperative intraventricular cerebral hemorrhage (IVH)        | Evaluation by cranial ultrasound preop., 4h, 1, 2, and 3 days and 1 and 2 weeks po; persistency of IVH-like findings 2 weeks po, according to <sup>9</sup>                                            | 6.7% (4/60)                     | 5.6% (3/54)  |
| Perioperative and postoperative clinical seizures               | -                                                                                                                                                                                                     | 3.3% (2/60)                     | 3.7% (2/54)  |

---

*Neurodevelopmental findings*

---

|                      |                                                                                                                                                                                                                                                                                       |                                          |          |                                          |          |
|----------------------|---------------------------------------------------------------------------------------------------------------------------------------------------------------------------------------------------------------------------------------------------------------------------------------|------------------------------------------|----------|------------------------------------------|----------|
| Endurance capacity   | Assessment by the Bruce Treadmill Test <sup>7</sup> : normal $\geq 10^{\text{th}}$ percentile; impaired $< 10^{\text{th}}$ percentile                                                                                                                                                 | Normal<br>(90%)<br>Impaired<br>(10%)     | 54<br>6  | Normal<br>(100%)                         | 54       |
| Neurological status  | Evaluation of complete clinical neurological status <sup>10</sup> : normal = no dysfunction; impaired = dysfunction in one or more domains (head shape and growth, cranial nerves, motor dyspraxia, ataxia, sensory dysfunction, palsy, clinical or electroencephalographic seizures) | Normal<br>(73.3%)<br>Impaired<br>(26.7%) | 44<br>16 | Normal<br>(81.5%)<br>Impaired<br>(18.5%) | 44<br>10 |
| Speech function      | Assessment by the Total Functional Score (volitional oral movements, articulation, phonation, and coordination of speech) of the Oral and Speech Motor Control Test <sup>11</sup> : normal $\geq 110$ points; impaired $< 110$ points                                                 | Normal<br>(60%)<br>Impaired<br>(40%)     | 36<br>24 | Normal<br>(64.8%)<br>Impaired<br>(35.2%) | 35<br>19 |
| Motor function       | Assessment by the Kiphard and Schilling Body-Coordination Test <sup>12</sup> : motor quotient; standard scores with a mean of 100 and a SD of 15                                                                                                                                      | 92.8 , 27.3 *<br>p=0.02 <sup>‡</sup>     |          | 98.9 , 16.7 *<br>p=0.33 <sup>‡</sup>     |          |
| Intelligence         | Assessment by the Kaufman-Assessment-Battery for Children (K-ABC) <sup>13</sup> : scale of intellectual function; standard scores with a mean of 100 and a SD of 15                                                                                                                   | 98.9 , 16.8 *<br>p=0.29 <sup>‡</sup>     |          | 100.6 , 14.5*<br>p=0.39 <sup>‡</sup>     |          |
| Academic achievement | Assessment by the K-ABC: acquired abilities (learning, knowledge); standard scores with a mean of 100 and a SD of 15                                                                                                                                                                  | 96.2 , 15.2 *<br>p=0.04 <sup>‡</sup>     |          | 96.9 , 16.7 *<br>p=0.09 <sup>‡</sup>     |          |
| Receptive language   | Assessment by the K-ABC: selected subtests 7, 13, 14, 16; standard scores with a mean of 100 and a SD of 15                                                                                                                                                                           | 96.9 , 12.6 *<br>p=0.08 <sup>‡</sup>     |          | 98.2 , 12.4 *<br>p=0.14 <sup>‡</sup>     |          |
| Expressive language  | Assessment by the K-ABC: selected subtests 4, 12, 14, 15; standard scores with a mean of 100 and a SD of 15                                                                                                                                                                           | 97.6 , 12.5 *<br>p=0.04 <sup>‡</sup>     |          | 97.4 , 12.5 *<br>p=0.07 <sup>‡</sup>     |          |

---

*Sociodemographic findings*

---

|                                           |                                                                                                                    |                                                    |                                                    |
|-------------------------------------------|--------------------------------------------------------------------------------------------------------------------|----------------------------------------------------|----------------------------------------------------|
| Age at neurodevelopmental testing (years) | -                                                                                                                  | 10.5 , 1.6 *                                       | 10.4 , 1.7 *                                       |
| Socioeconomic status                      | Social classification (5 categories) of the family by the main breadwinner's profession, according to <sup>8</sup> | p = 0.11 <sup>§</sup><br>versus published controls | p = 0.15 <sup>§</sup><br>versus published controls |

---

CPB, cardio-pulmonary bypass; DHCA, deep hypothermic circulatory arrest; po, postoperatively; preop., preoperatively; VSD, ventricular septal defect.

\*Results as mean , standard deviation (SD).

<sup>†</sup>Low cardiac output = clinically estimated by means of arterial pressure (target value for mean pressure 45 mm Hg), central venous pressure (target value 5 to 7 mm Hg), diuresis (target value > 1.5 ml/kg of body weight/hour), capillary refill time and skin temperature.

<sup>‡</sup> Versus published normal children; p values calculated by comparison of mean values (t-tests).

<sup>§</sup> P value calculated by comparison of frequencies (chi<sup>2</sup>-test); socioeconomic status representing an ordinal scale.

<sup>#</sup> **Group A: total group of 60 children; group B: subgroup of 54 children without severe neurological damage.**
